# Supplementary material for: Novel synthesis of in situ CeOx nanoparticles decorated on CoP nanosheets for highly efficient electrocatalytic oxygen evolution
Source: Royal Society of Chemistry journal article supplement (doi:10.1039/d1qi00821h), 2021-01-01
Supplement: d1qi00821h1.pdf [file d1qi00821h1.pdf]

**Electronic Supplementary Information (ESI)**  
**for:**  
**Novel Synthesis of In-situ CeO<sub>x</sub> Nanoparticles**  
**Decorated on CoP Nanosheets for Highly Efficient**  
**Electrocatalytic Oxygen Evolution**

Xiaoxia Wu,<sup>abc</sup> Jiayu Wei,<sup>b</sup> Tong Zhang,<sup>b</sup> Yuchen Yang,<sup>b</sup> Qingyi Liu,<sup>b</sup> Xingbin Yan,<sup>\*ac</sup>  
and Yu Tang,<sup>\*ab</sup>

<sup>a</sup> Laboratory of Clean Energy Chemistry and Materials, State Key Laboratory of Solid Lubrication, Lanzhou Institute of Chemical Physics Chinese Academy of Sciences, Lanzhou 730000, P. R. China

<sup>b</sup> State Key Laboratory of Applied Organic Chemistry, Key Laboratory of Nonferrous Metal Chemistry and Resources Utilization of Gansu Province, College of Chemistry and Chemical Engineering, Lanzhou University, Lanzhou 730000, P. R. China

<sup>c</sup> Center of Materials Science and Optoelectronics Engineering, University of Chinese Academy of Sciences, Beijing 100049, P. R. China

\*Corresponding Author:

E-mail: xbyan@licp.cas.cn; tangyu@lzu.edu.cn

## Contents

### 1. Supporting Figures

### 2. Supporting Tables

### 3. Supplementary References

## 1. Supporting Figures

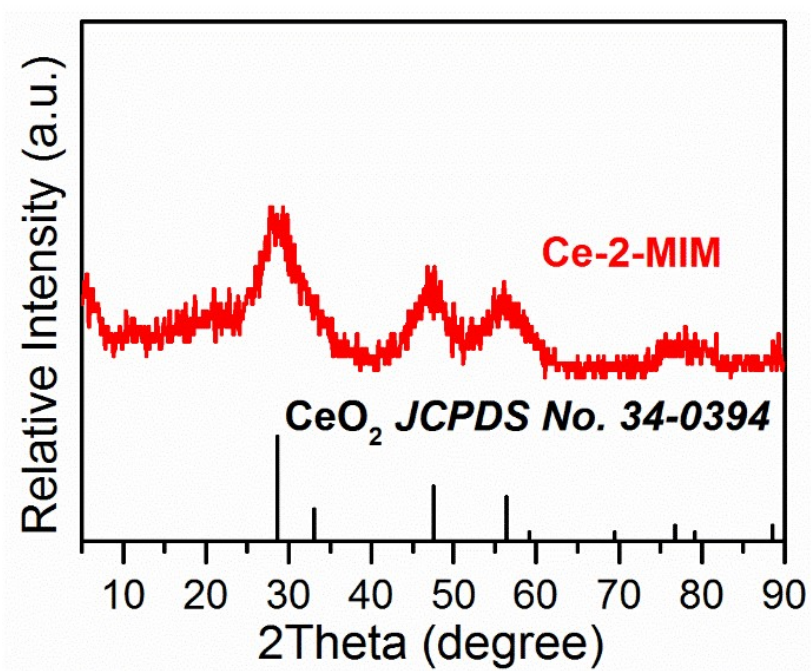

Fig. S1. XRD patterns of Ce-2-MIM

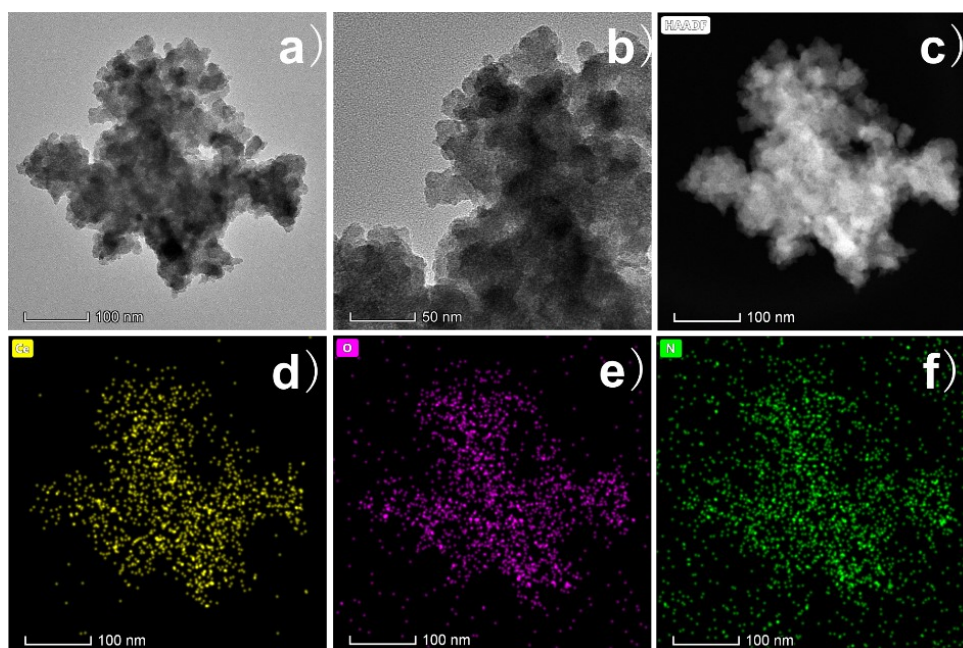

**Fig. S2.** TEM images of Ce-2-MIM

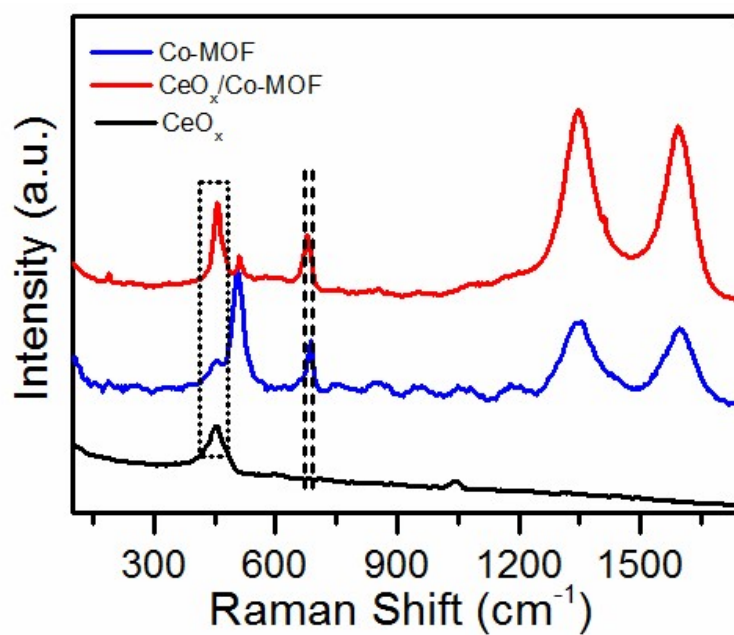

**Fig. S3.** Raman spectra of CeO<sub>x</sub>, Co-2-MIM and CeO<sub>x</sub>/Co-2-MIM

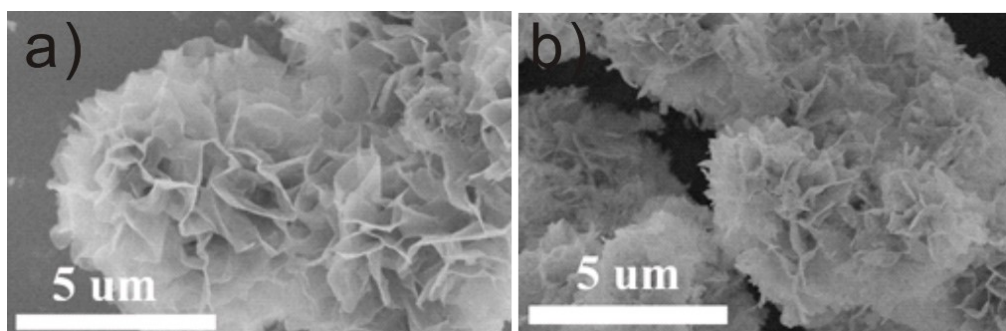

**Fig. S4.** SEM images of a) Co-2-MIM and b) CeO<sub>x</sub>/Co-2-MIM

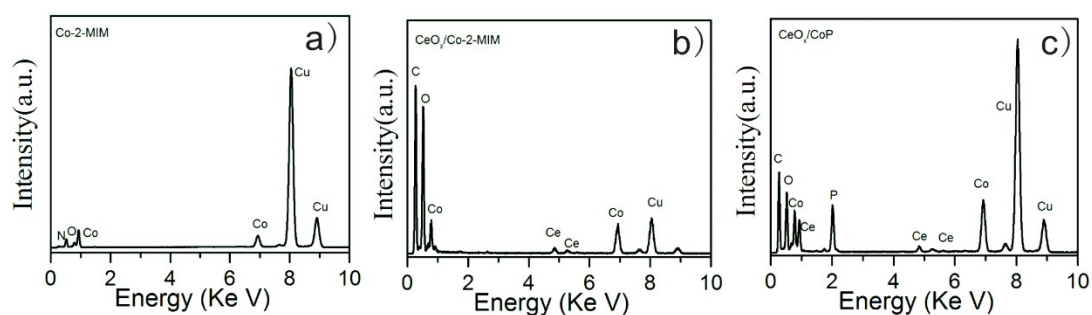

**Fig. S5.** EDX analysis of as-prepared electrodes

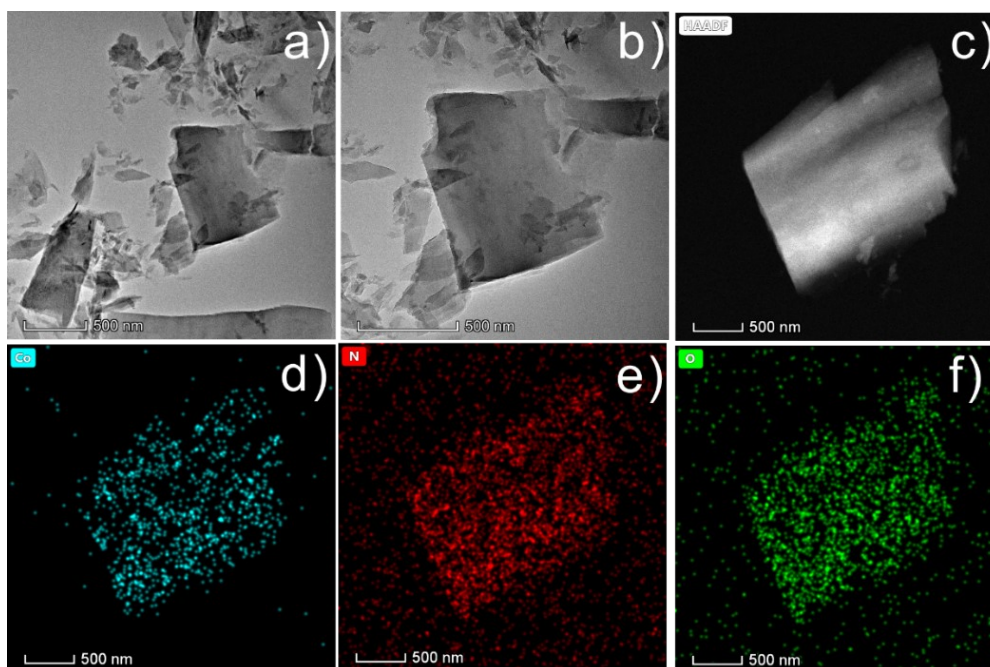

**Fig. S6.** TEM images of Co-BPDC

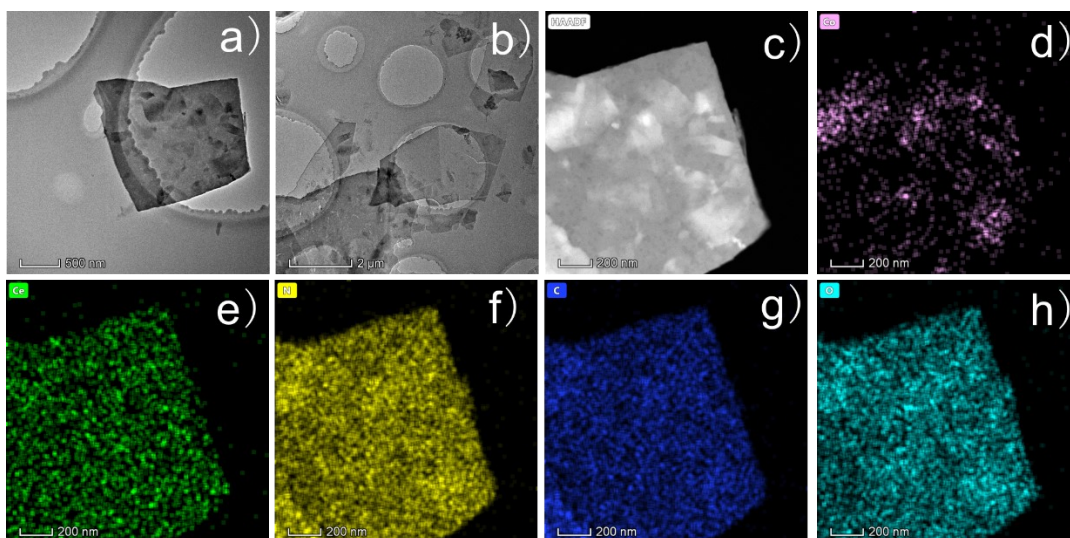

**Fig. S7.** TEM images of Ce-BPDC+Co-BPDC

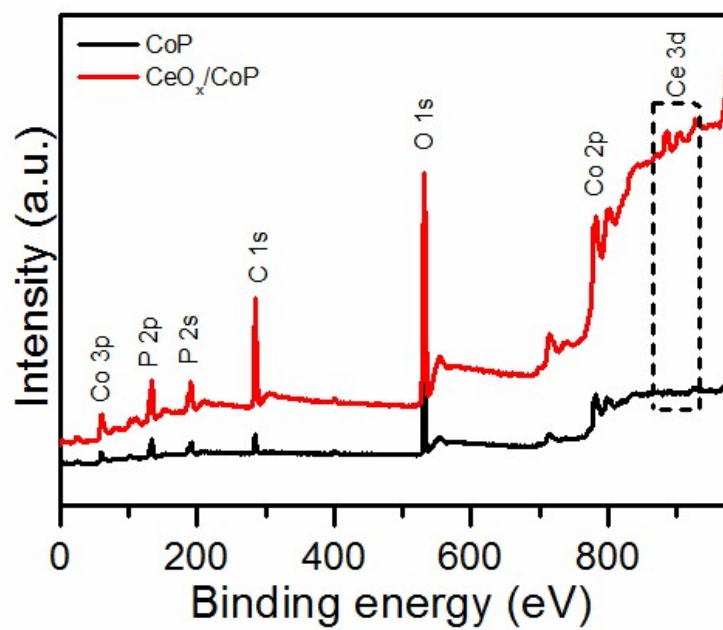

**Fig. S8.** XPS survey spectrum of CoP and  $\text{CeO}_x/\text{CoP}$



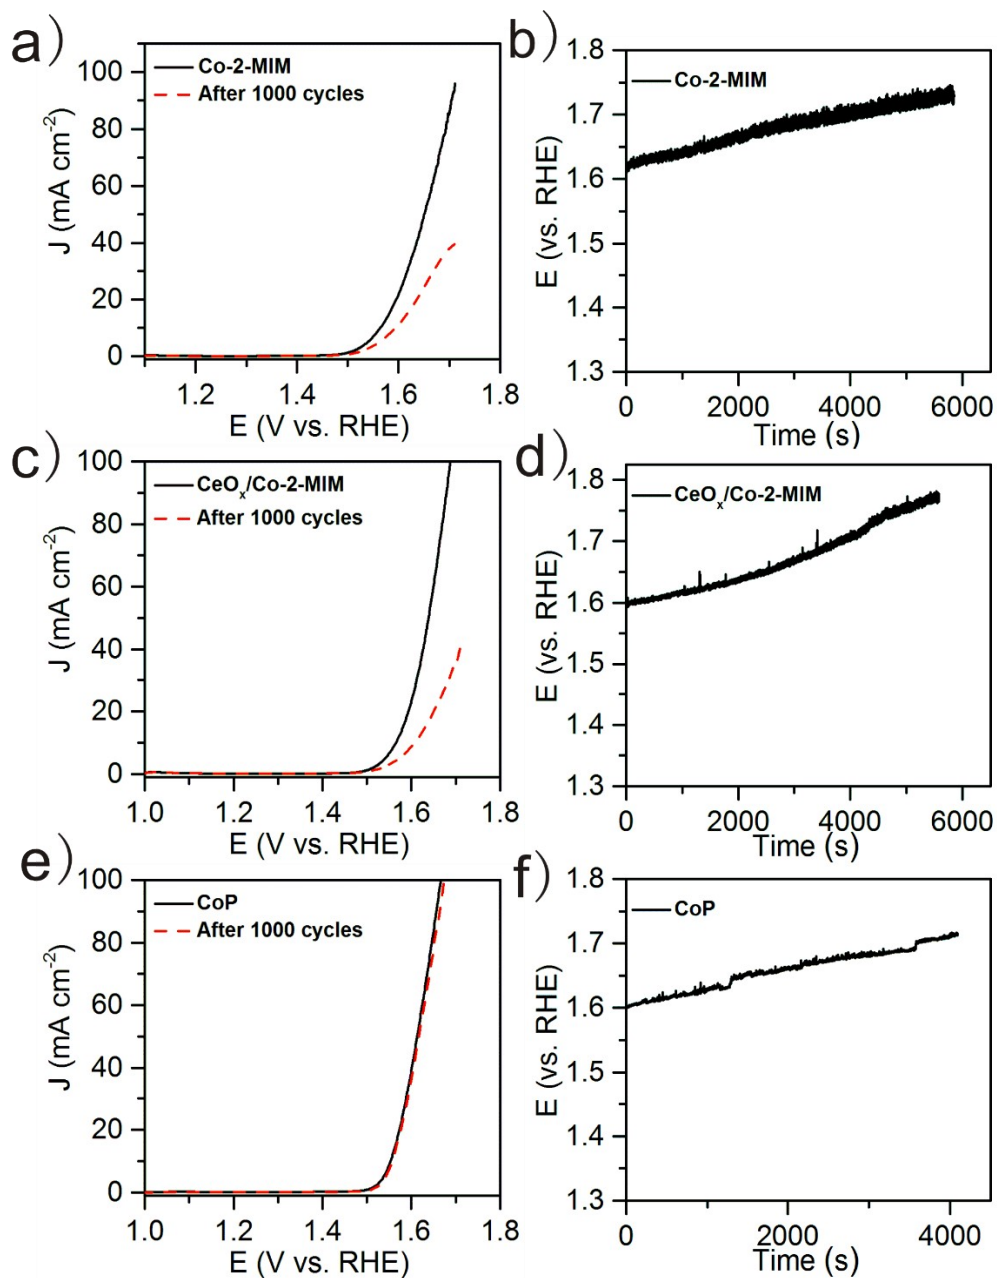

**Fig. S9.** Polarization curves before and after CV sweeps and chronopotentiometric curve of (a-b) Co-2-MIM; (c-d)  $\text{CeO}_x/\text{Co-2-MIM}$  and (e-f) CoP

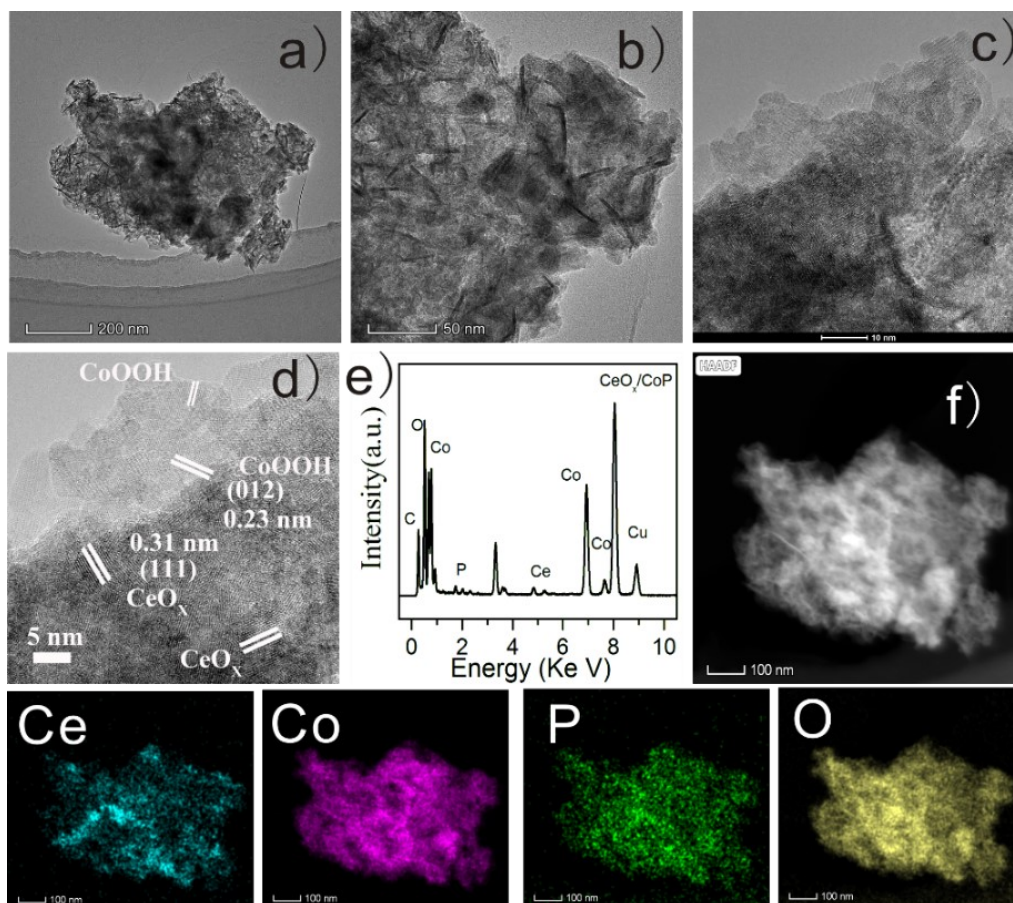

**Fig. S10.**  $\text{CeO}_x/\text{CoP}$  after the OER reaction of (a-c) TEM images; (d) highmagnification TEM images; (e) EDX analysis; (f) corresponding elemental mapping results.

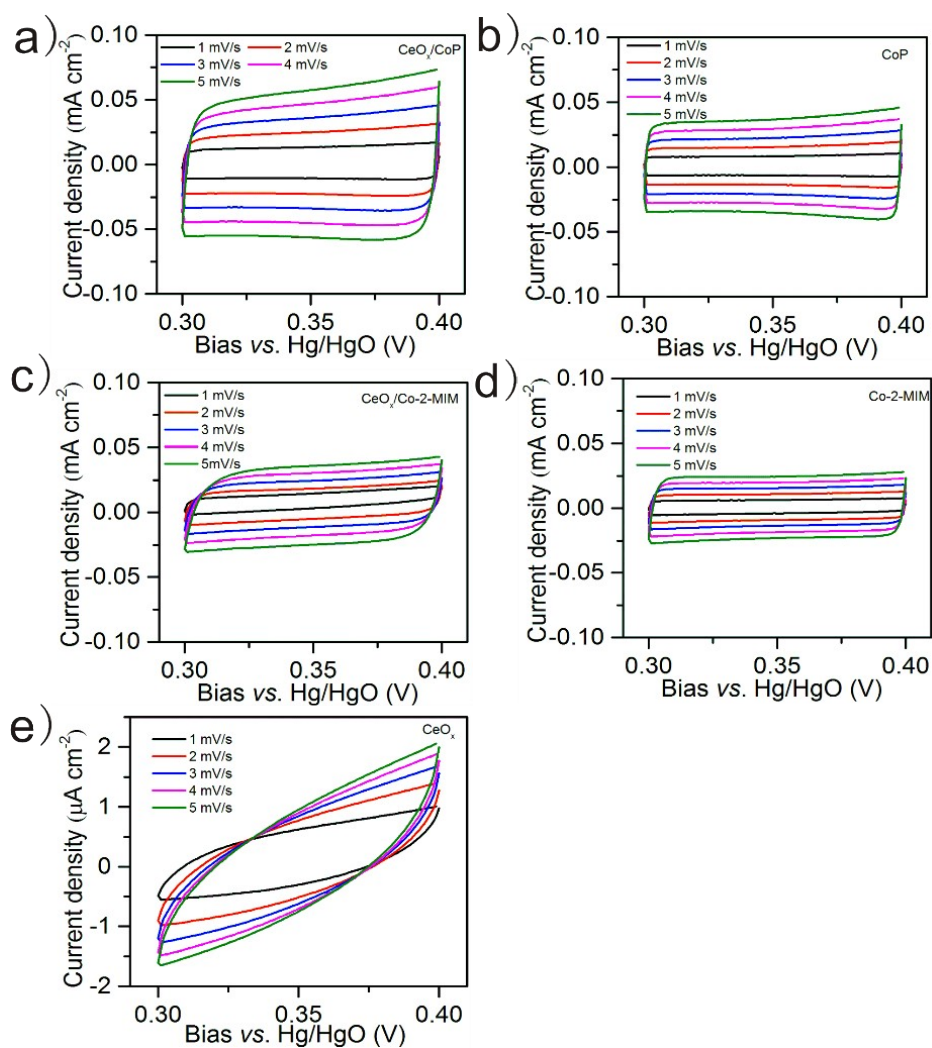

**Fig. S11.** (a-e) Typical cyclic voltammetry curves of as-prepared electrodes with different scan rates ( $1, 2, 3, 4, 5 \text{ mV s}^{-1}$ )

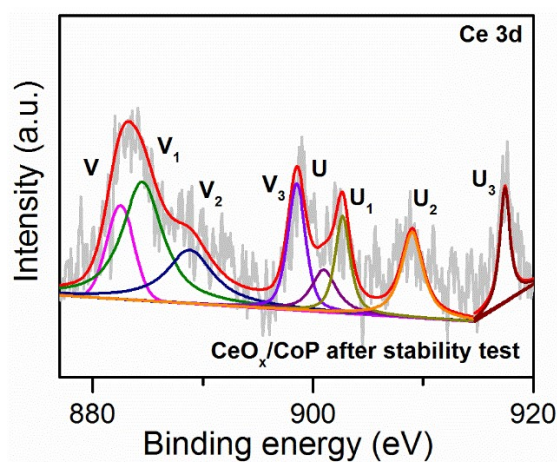

**Fig. S12.** Ce 3d XPS spectra of  $\text{CeO}_x/\text{CoP}$  after the OER reaction



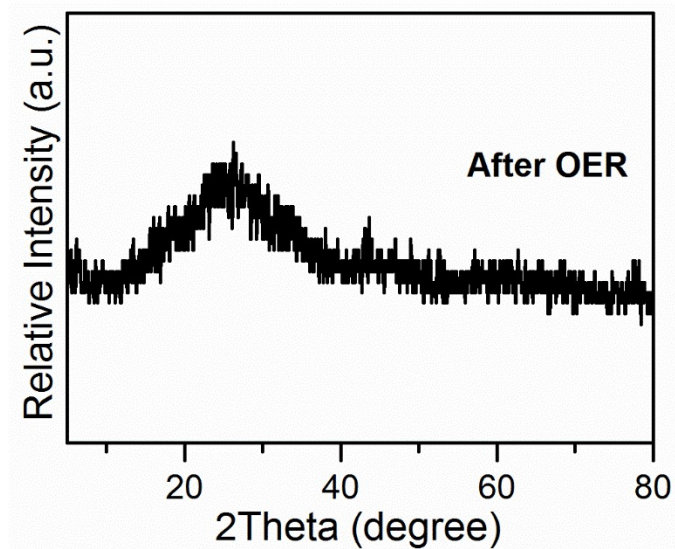

**Fig. S13.** XRD patterns of  $\text{CeO}_x/\text{CoP}$  after the OER reaction

## 2. Supporting Tables

**Table S1.** The weight percentage content of elements in  $\text{CeO}_x/\text{CoP}$  from ICP-AES and Elemental analysis data.

| Element | Ce    | Co    |
|---------|-------|-------|
| wt%     | 10.72 | 89.28 |

**Table S2.** Comparison of catalytic performance with cobalt-based electrocatalysts previously reported.

| Catalysts                                              | Support   | $\eta$ @ mA cm <sup>-2</sup><br>(mV) | Ref.             |
|--------------------------------------------------------|-----------|--------------------------------------|------------------|
| CoP                                                    | CC        | 300@10                               | 1                |
| Co-P@NC                                                | GC        | 370@10                               | 2                |
| P-Co <sub>3</sub> O <sub>4</sub>                       | NF        | 260@20                               | 3                |
| Ni <sub>1</sub> Co <sub>3</sub> -P@CSs                 | RDE       | 330@20                               | 4                |
| MoCoP                                                  | CC        | 305@10                               | 5                |
| Co <sub>3</sub> S <sub>4</sub> @MoS <sub>2</sub>       | GC        | 310@10                               | 6                |
| Cobalt Sulfide                                         | CP        | 306@10                               | 7                |
| Co <sub>0.6</sub> Fe <sub>0.4</sub> P <sub>1.125</sub> | GC        | 298@10                               | 8                |
| CoP/NCNHP                                              | Ni foam   | 310@10                               | 9                |
| NiCo <sub>2</sub> S <sub>4</sub> HSs                   | GC        | 400@10                               | 10               |
| CoS <sub>x</sub> /Ni <sub>3</sub> S <sub>2</sub> @ NF  | Ni foam   | 280@20                               | 11               |
| CoP/CNTs                                               | Ni foam   | 309@10                               | 12               |
| CeO <sub>x</sub> /CoP                                  | <b>GC</b> | <b>293@10</b>                        | <b>This work</b> |

### 3. Supplementary References

1. Y. Cheng, F. Liao, W. Shen, L. Liu, B. Jiang, Y. Li and M. Shao, Carbon cloth supported cobalt phosphide as multifunctional catalysts for efficient overall water splitting and zinc-air batteries, *Nanoscale*, 2017, **9**, 18977-18982.
2. M. Zhai, F. Wang and H. Du, Transition-Metal Phosphide-Carbon Nanosheet

Composites Derived from Two-Dimensional Metal-Organic Frameworks for Highly Efficient Electrocatalytic Water-Splitting, *ACS Appl. Mater. Interfaces*, 2017, **9**, 40171-40179.

3. Z. Wang, H. Liu, R. Ge, X. Ren, J. Ren, D. Yang, L. Zhang and X. Sun, Phosphorus-Doped Co<sub>3</sub>O<sub>4</sub> Nanowire Array: A Highly Efficient Bifunctional Electrocatalyst for Overall Water Splitting, *ACS Catalysis*, 2018, **8**, 2236-2241.

4. V. H. Hoa, D. T. Tran, H. T. Le, N. H. Kim and J. H. Lee, Hierarchically porous nickel-cobalt phosphide nanoneedle arrays loaded micro-carbon spheres as an advanced electrocatalyst for overall water splitting application, *Appl. Catal. B: Environ*, 2019, **253**, 235-245.

5. C. Guan, W. Xiao, H. Wu, X. Liu, W. Zang, H. Zhang, J. Ding, Y. P. Feng, S. J. Pennycook and J. Wang, Hollow Mo-doped CoP nanoarrays for efficient overall water splitting, *Nano Energy*, 2018, **48**, 73-80.

6. Y. Guo, J. Tang, H. Qian, Z. Wang and Y. Yamauchi, One-Pot Synthesis of Zeolitic Imidazolate Framework 67-Derived Hollow Co<sub>3</sub>S<sub>4</sub>@MoS<sub>2</sub> Heterostructures as Efficient Bifunctional Catalysts, *Chemistry of Materials*, 2017, **29**, 5566-5573.

7. J. Wang, H.-x. Zhong, Z.-l. Wang, F.-l. Meng and X.-b. Zhang, Integrated Three-Dimensional Carbon Paper/Carbon Tubes/Cobalt-Sulfide Sheets as an Efficient Electrode for Overall Water Splitting, *Acs Nano*, 2016, **10**, 2342-2348.

8. Y. Lian, H. Sun, X. Wang, P. Qi, Q. Mu, Y. Chen, J. Ye, X. Zhao, Z. Deng and Y.

Peng, Carved nanoframes of cobalt-iron bimetal phosphide as a bifunctional electrocatalyst for efficient overall water splitting, *Chem. Sci.*, 2019, **10**, 464-474.

9. Y. Pan, K. Sun, S. Liu, X. Cao, K. Wu, W. C. Cheong, Z. Chen, Y. Wang, Y. Li, Y. Liu, D. Wang, Q. Peng, C. Chen and Y. Li, Core-Shell ZIF-8@ZIF-67-Derived CoP Nanoparticle-Embedded N-Doped Carbon Nanotube Hollow Polyhedron for Efficient Overall Water Splitting, *J. Am. Chem. Soc.*, 2018, **140**, 2610-2618.

10. F. Kong, K. Chen, S. Song and D. Xue, Metal organic framework derived CoFe@N-doped carbon/reduced graphene sheets for enhanced oxygen evolution reaction, *Inorg. Chem. Front.*, 2018, **5**, 1962-1966.

11. S. Shit, S. Chhetri, W. Jang, N. C. Murmu, H. Koo, P. Samanta and T. Kuila, Cobalt Sulfide/Nickel Sulfide Heterostructure Directly Grown on Nickel Foam: An Efficient and Durable Electrocatalyst for Overall Water Splitting Application, *ACS Appl. Mater. Interfaces*, 2018, **10**, 27712-27722.

12. X. Zhang, X. Zhang, H. Xu, Z. Wu, H. Wang and Y. Liang, Iron-Doped Cobalt Monophosphide Nanosheet/Carbon Nanotube Hybrids as Active and Stable Electrocatalysts for Water Splitting, *Adv. Funct. Mater.*, 2017, **27**, 1606635.
